# Supplementary material
Source: Springer Nature journal article supplement (https://www.springerprofessional.de/resource/supplementary/13638_2011_347_MOESM5_ESM.pdf/11897654)

$SS$

Elements  
in  $S_1$

Elements  
in  $S_2$

Elements  
in  $S_M$

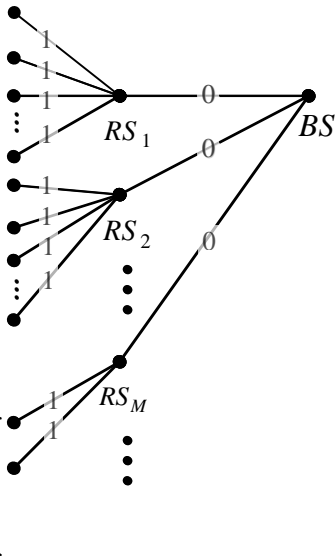

Supplement: MOESM5 [file 11897654]
